# Supplementary material
Source: publisher site journal article supplement (https://www.dovepress.com/get_supplementary_file.php?f=460418.docx)
Supplement: Supplementary file 1 [file get_supplementary_file.php]

Additional Methods

Catwalk Gait Metrics

The following gait measures were generated by the Catwalk analysis software and depicted in **Figure 2** and **Additional Figures 1-3**: ‘*Stand:*’ the duration of contact of a paw with the glass plate. ‘*Stand index:*’ the speed at which a paw loses contact with the glass plate. ‘*Swing:*’ the duration of no contact of a paw with the glass plate. ‘*Swing speed:*’ stride length/swing time. ‘*Stride length:*’ the distance between successive placements of the same paw. ‘*Step cycle:*’ the time between two consecutive initial contacts of the same paw (stand + swing). ‘*Single stance:*’ the duration of ground contact of a single hind paw. ‘*Dual stance:*’ the duration of ground contact for both hind paws. ‘*Print area:*’ the surface area of the complete paw print. ‘*Average speed:*’ the speed of the mouse’s body across the recorded runs. ‘*Body speed:*’ the distance the body travels from one initial contact of a hindpaw to the next. ‘*Body speed variability:*’ body speed-average speed / average speed ‘*Intermediate toe spread:*’ the distance between the center of the second and fourth toes of a hindpaw. ‘*Regularity index*:’ the number of normal step sequence patterns relative to the total number of paw placements. ‘*Max contact area:*’ the print area at the point of maximum contact. ‘*Max intensity:*’ the maximum intensity of the complete paw print. ‘*Mean intensity:*’ the mean intensity of the complete paw print. ‘*Max variation:*’ the maximum variation in walking speed in the recorded runs.

Grip Strength

A Grip Strength Meter (Bioseb) was used to measure hindlimb grip strength. All habituation and testing was performed in the light cycle between 12:00 and 16:00 h. Grip strength was measured before injury and 3, 14, 28 and 60 days post-injury. Mice were restrained by the scruff of the neck and once both hind paws gripped the wire mesh, the mouse was slowly pulled away from the grip strength meter. The max pull force in grams was then recorded.

Additional Figures


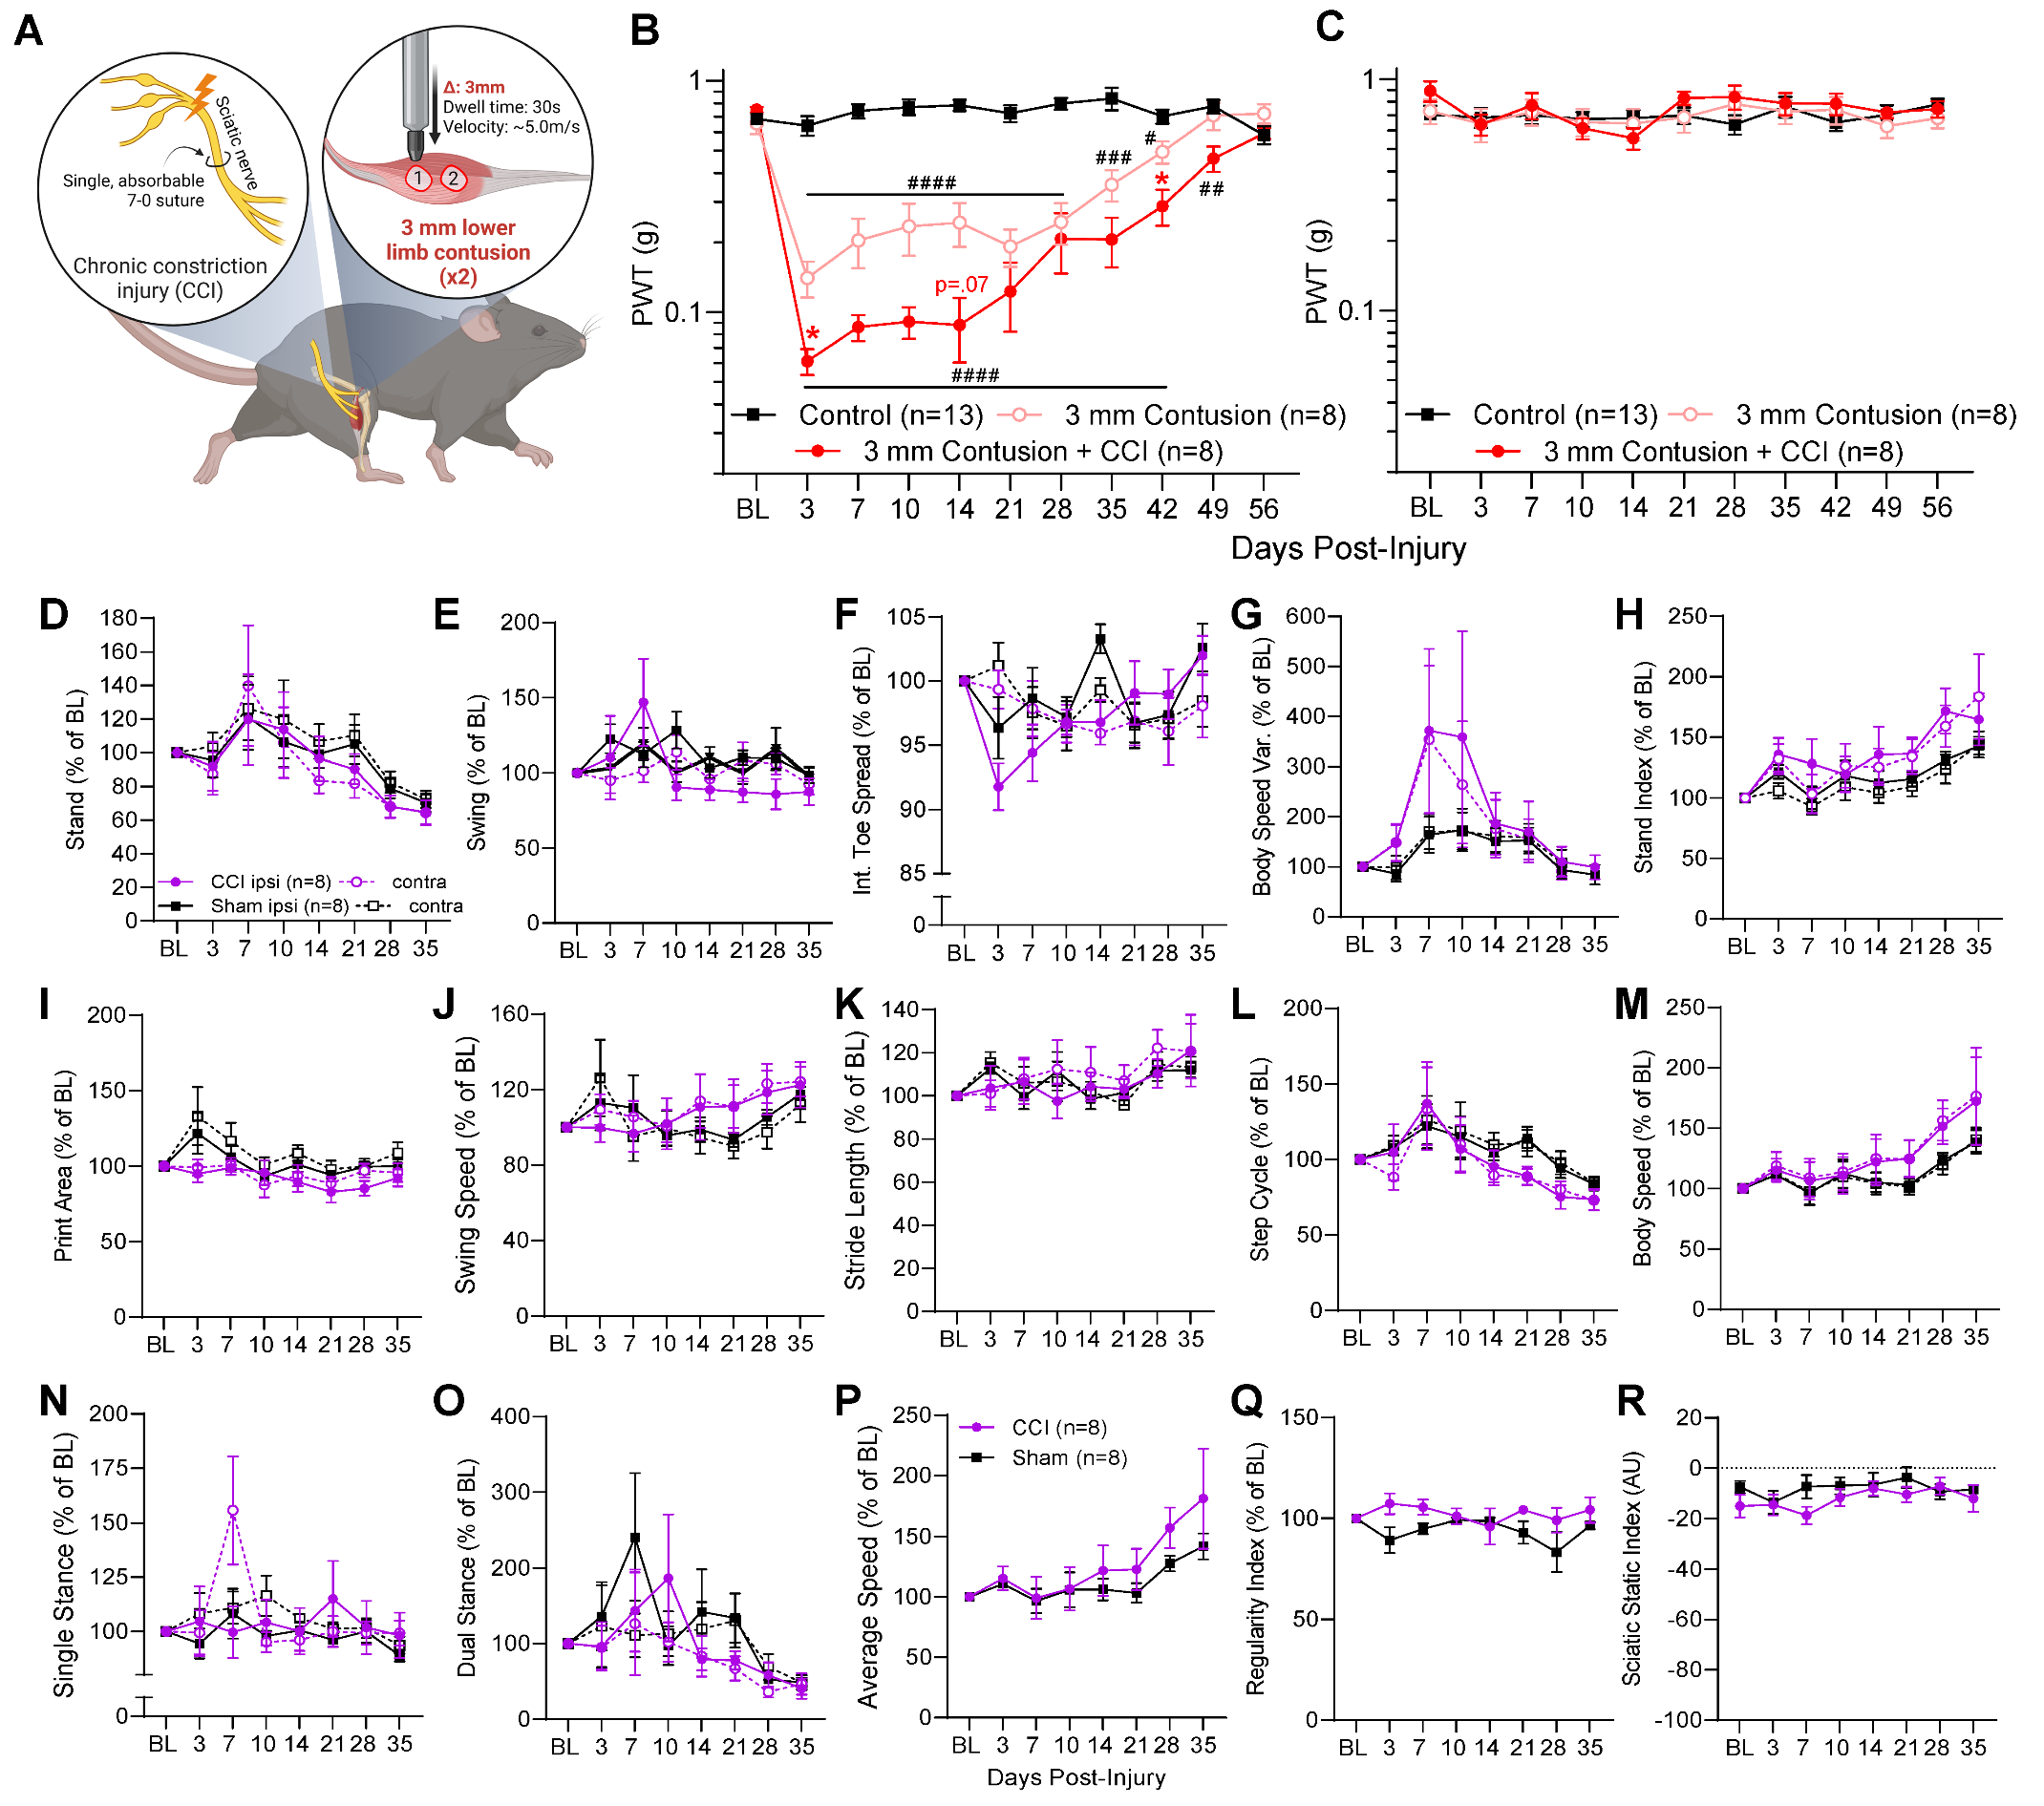


**Additional Figure 1 3mm polytrauma von Frey and no overt changes in hindpaw placement following mild CCI.** (**A**) Illustration of mild CCI paired with 3 mm lower limb contusion (‘3 mm polytrauma’). (**B**) Uninjured control mice show stable von Frey sensitivity. ‘3 mm contusion’ results in significant hypersensitivity versus control mice up to 49 days post-injury (mice in this group also received sham CCI surgery to control for skin and muscle incision). Pairing 3 mm contusion with mild CCI (‘3 mm contusion + CCI’) resulted in significantly greater hypersensitivity at 3 and 42 days post-injury. (**C**) Hindpaws contralateral to contusion/CCI show no significant changes in sensitivity across time. (**D-R**) All sham and CCI values ipsilateral and contralateral to injury are depicted as percent of baseline (BL) readings. (**A**) Stand time. (**B**) Swing time. (**C**) Intermediate toe spread. (**D**) Body Speed Variability. (**E**) Stand Index. (**F**) Print area. (**G**) Swing Speed. (**H**) Stride length. (**I**) Step cycle. (**J**) Body speed. (**K**) Single Stance Time. (**L**) Dual Stance Time. (**M**) Average speed. (**N**) Regularity index. (**O**) Sciatic Static Index. Mean ± SEM, n=8 per group.

**
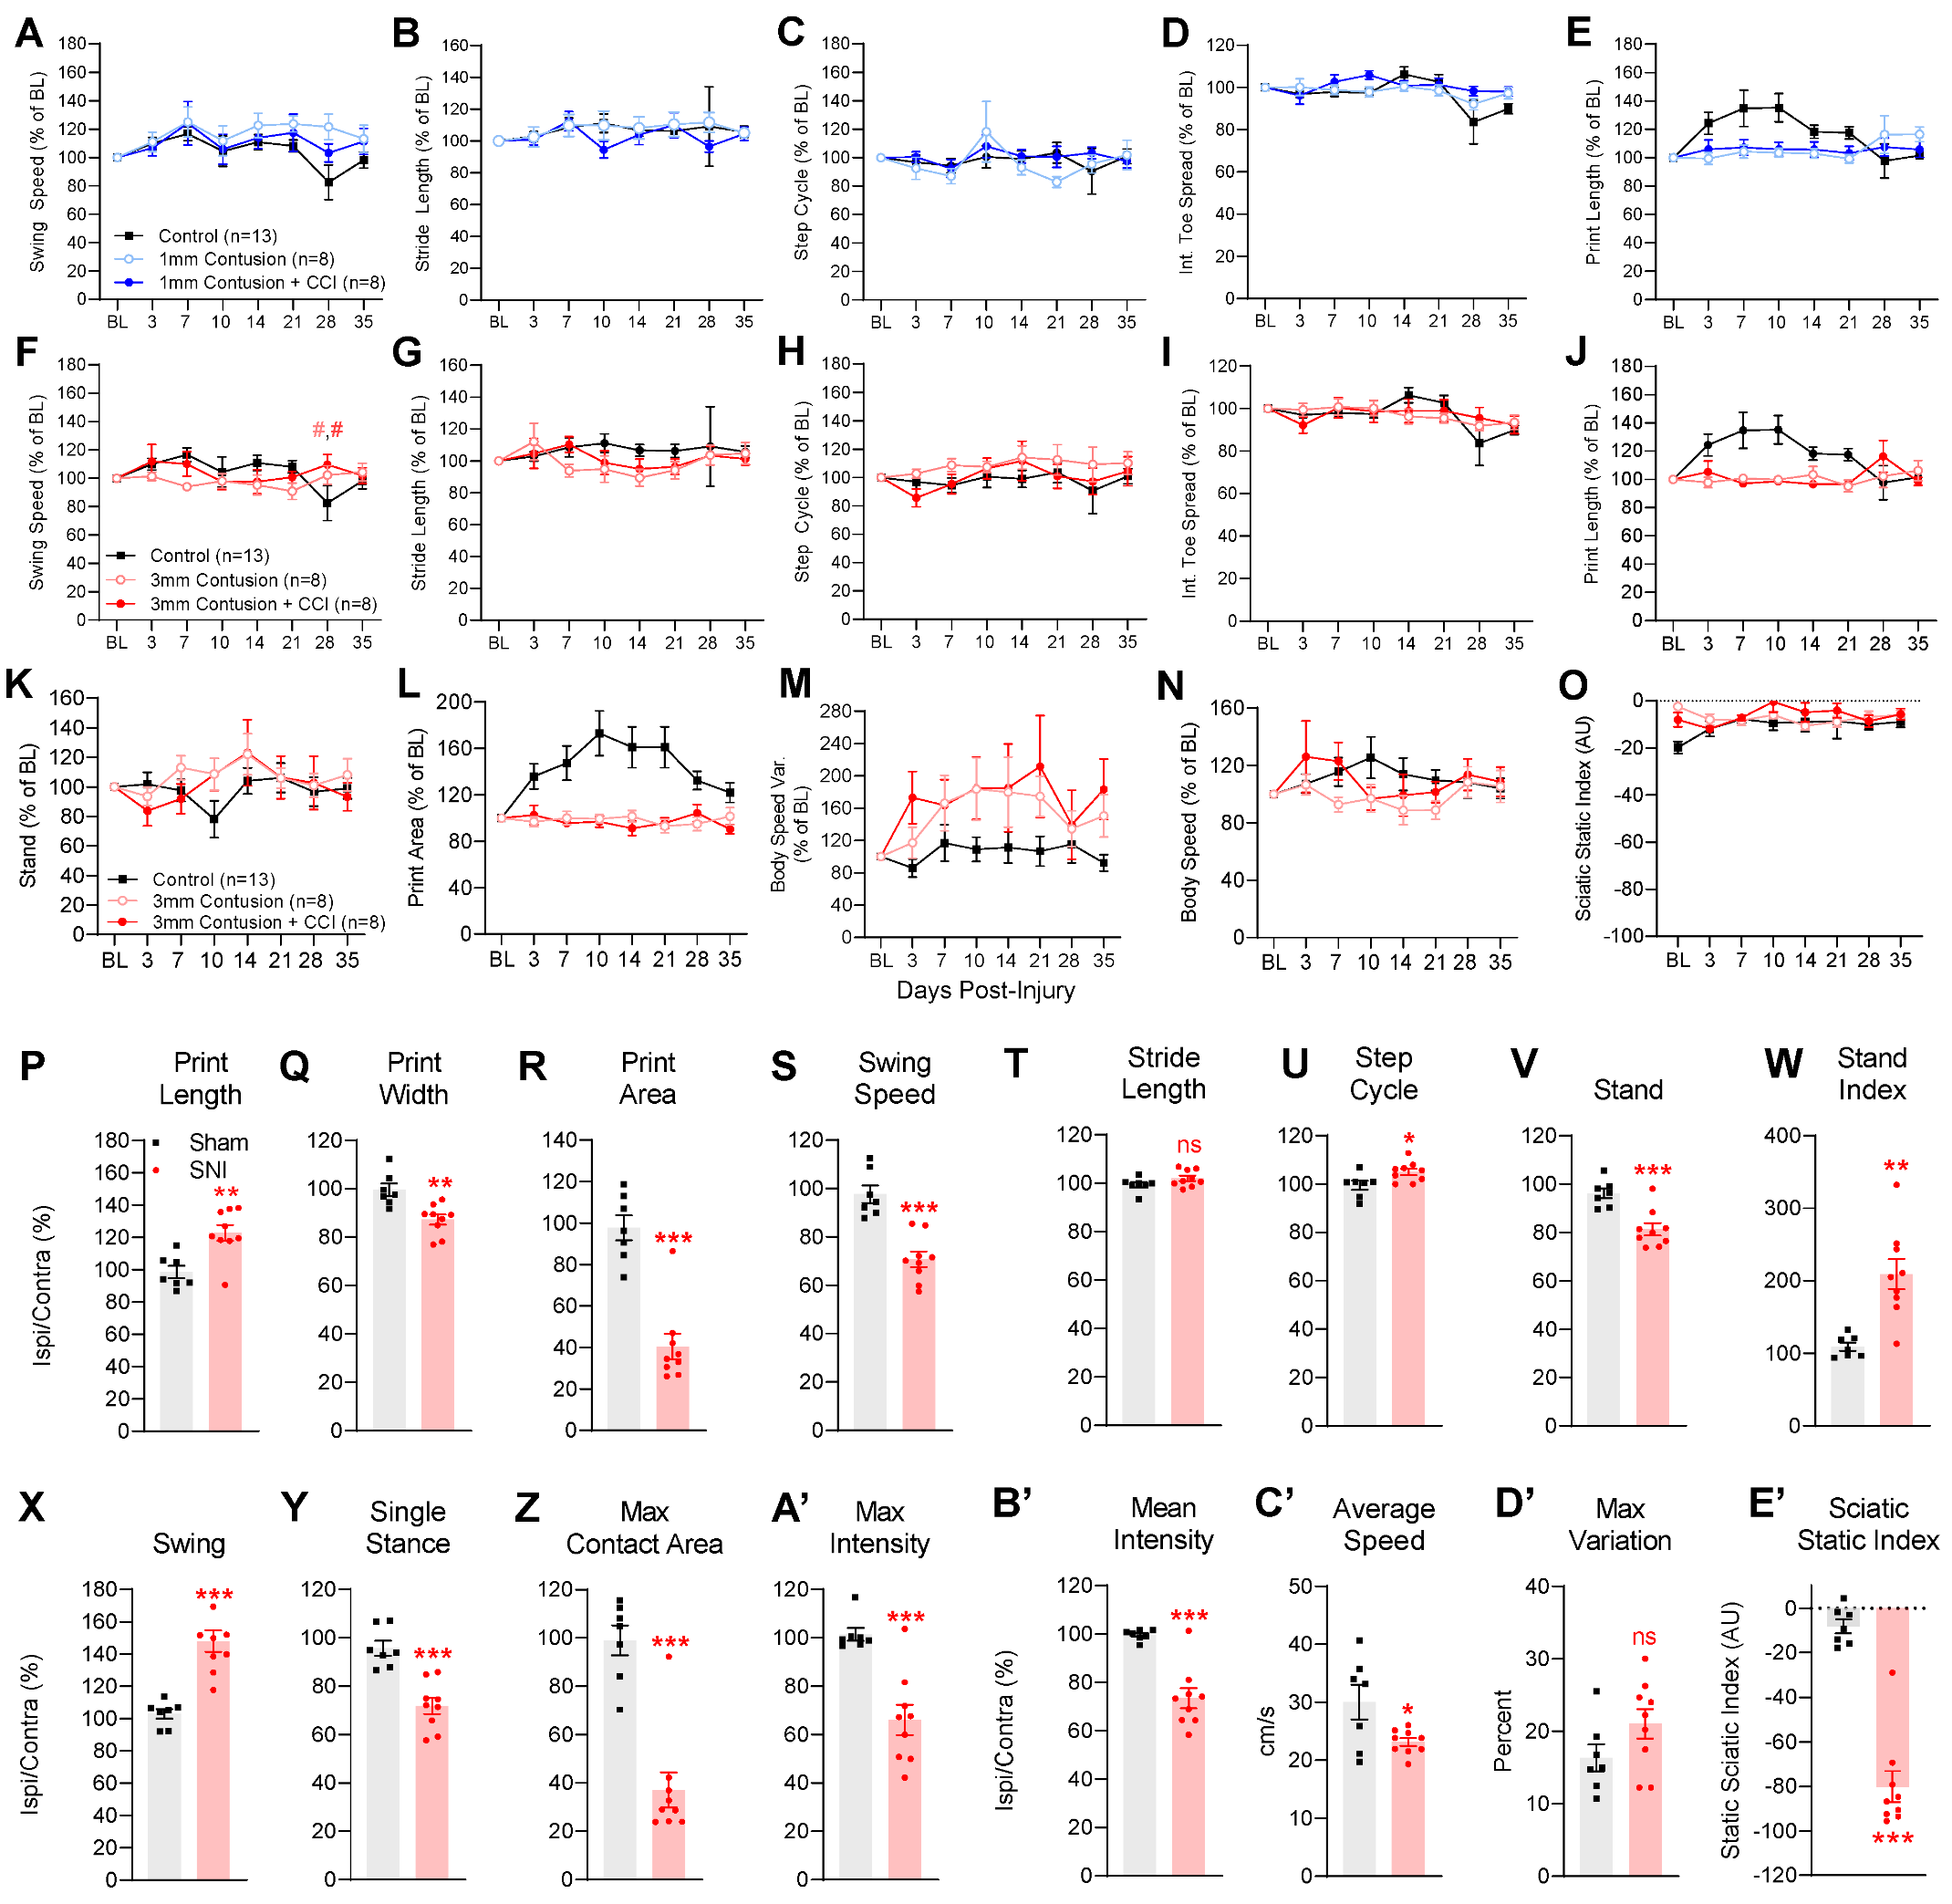
**

**Additional Figure 2 Supplementary gait indices in mice subjected to muscle contusion or polytrauma** (**A-E**) Gait metrics from ipsilateral hindpaws of mice subjected to 1 mm contusion alone, 1 mm polytrauma or uninjured controls. (**F-O**) Gait metrics from ipsilateral hindpaws of mice subjected to 3 mm contusion alone, 3 mm polytrauma or uninjured controls. Control values re-plotted from panels A-E. (**A, F**) Swing speed. (**B, G**) Stride length. (**C, H**) Step cycle time. (**D, I**) Intermediate toe spread. (**E, J**) Print Length. Mean ± SEM, n=8 per group.(**P-E’**)14 days after surgery, 7 sham surgery controls and 8 SNI mice were tested in Catwalk. In contrast to CCI and polytrauma, significant gait disturbances were detected in SNI mice. Significantly increased print length (**P**), Step cycle (**U**), Stand index (**W**) and swing time (**X**). Significantly reduced print width (**Q**), print area (**R**), swing speed (**S**), stand time (**V**), single stance time (**Y**), max contact area (**Z**), max/mean intensity (**A’-B’**), average speed (**C’**) and sciatic static index (**E’**). No significant change in stride length (**T**) or maximum speed variation (**D’**). */**/*** p=<.05, .01, .001, unpaired T-test.


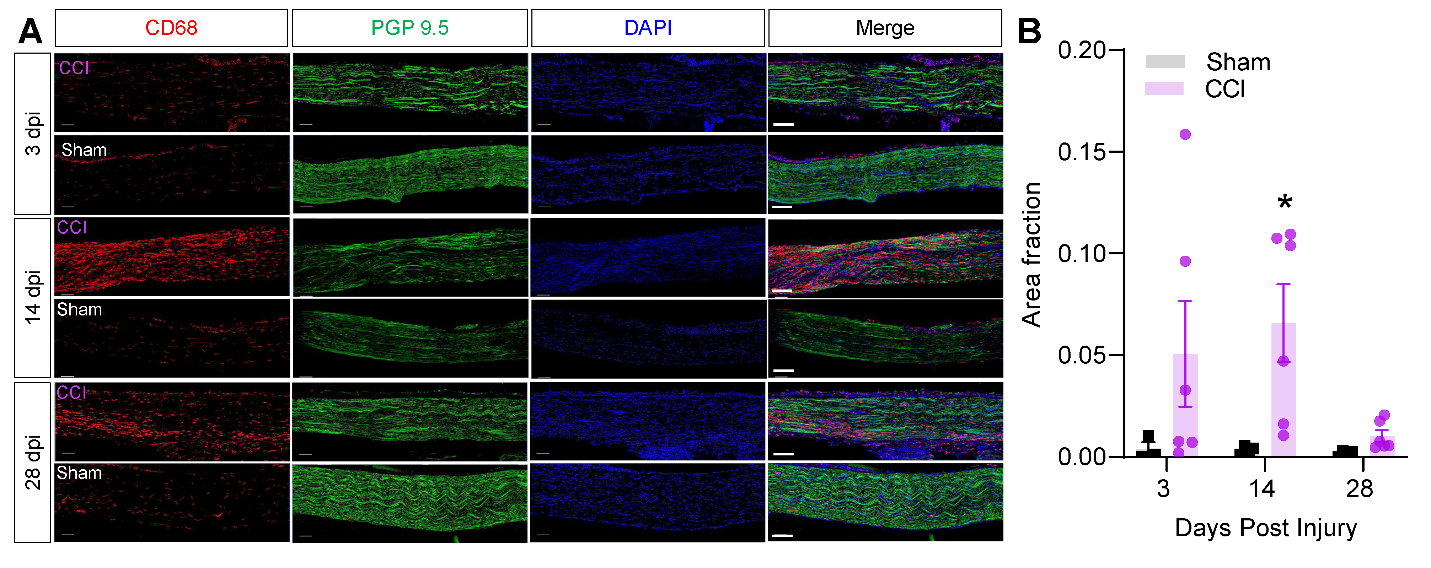


**Additional Figure 3 Mild CCI alone is associated with macrophage accumulation in the sciatic nerve** (**A**) Increased CD68+ signal density (red) is observed in ipsilateral sciatic nerve 14 days after CCI versus sham surgery controls. PGP9.5 neuronal marker (green), DAPI (blue). Scale bar: 200 µm. (**B**) Quantification of CD68 density within sciatic nerves following sham or CCI surgery at 3, 14 and 28 days post-injury. Values expressed as percent of PGP9.5+ area that co-registered as positive for CD68. Group n=6, derived from 2-3 biological replicates. Error bars = mean ± SEM, dpi = days post-injury, * p=<0.05 ‘CCI’ versus respective ‘sham’ timepoint value. Two-way ANOVA, Šídák's multiple comparisons test.

**
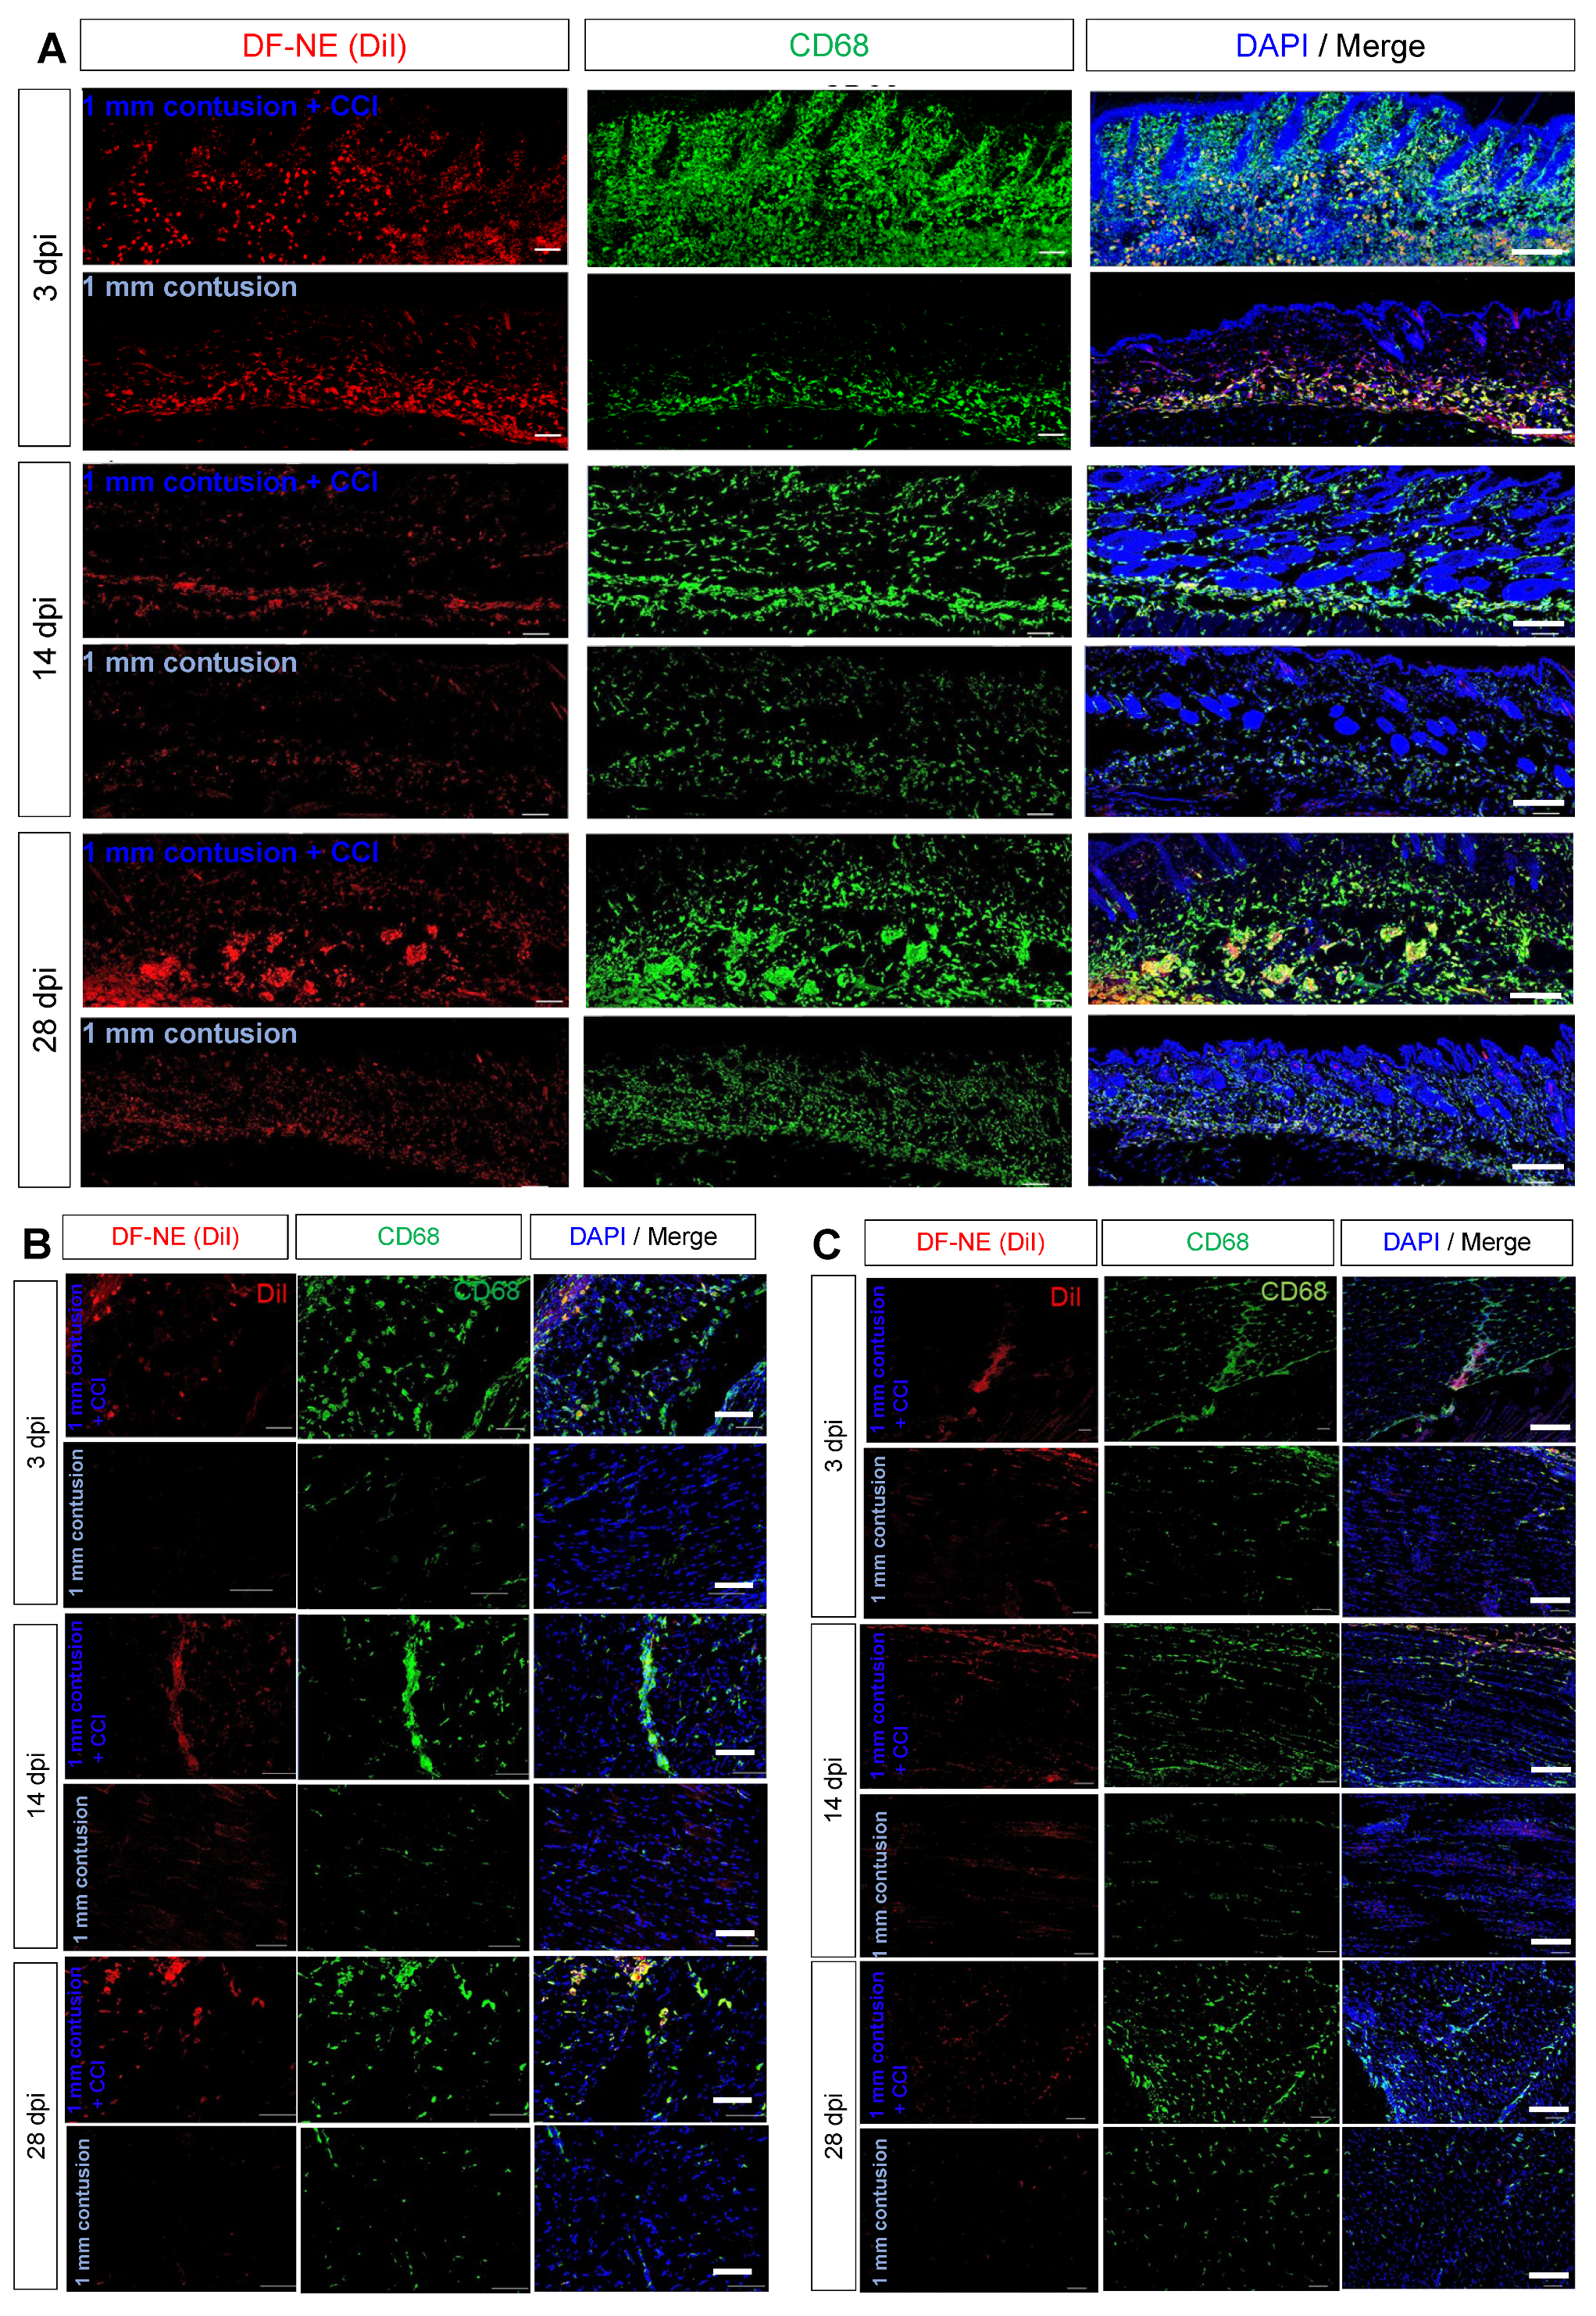
**

**Additional Figure 4 Time course of tissues subjected to 1 mm contusion or 1 mm polytrauma** (**A**)Increased macrophage density in 1 mm polytrauma dermis versus 1 mm contusion alone. Rows 1-2: 3 days post-injury. Rows 3-4: 14 days post-injury. Rows 5-6: 28 days post-injury. Scale bar: 200 µm.(**B**)Increased macrophage density in 1 mm polytrauma biceps femoris muscle versus 1 mm contusion alone. Rows 1-2: 3 days post-injury. Rows 3-4: 14 days post-injury. Rows 5-6: 28 days post-injury. Scale bar: 100 µm.(**C**)Increased macrophage density in 1mm polytrauma gastrocnemius muscle versus 1 mm contusion alone. Rows 1-2: 3 days post-injury. Rows 3-4: 14 days post-injury. Rows 5-6: 28 days post-injury. Scale bar: 100 µm.

**
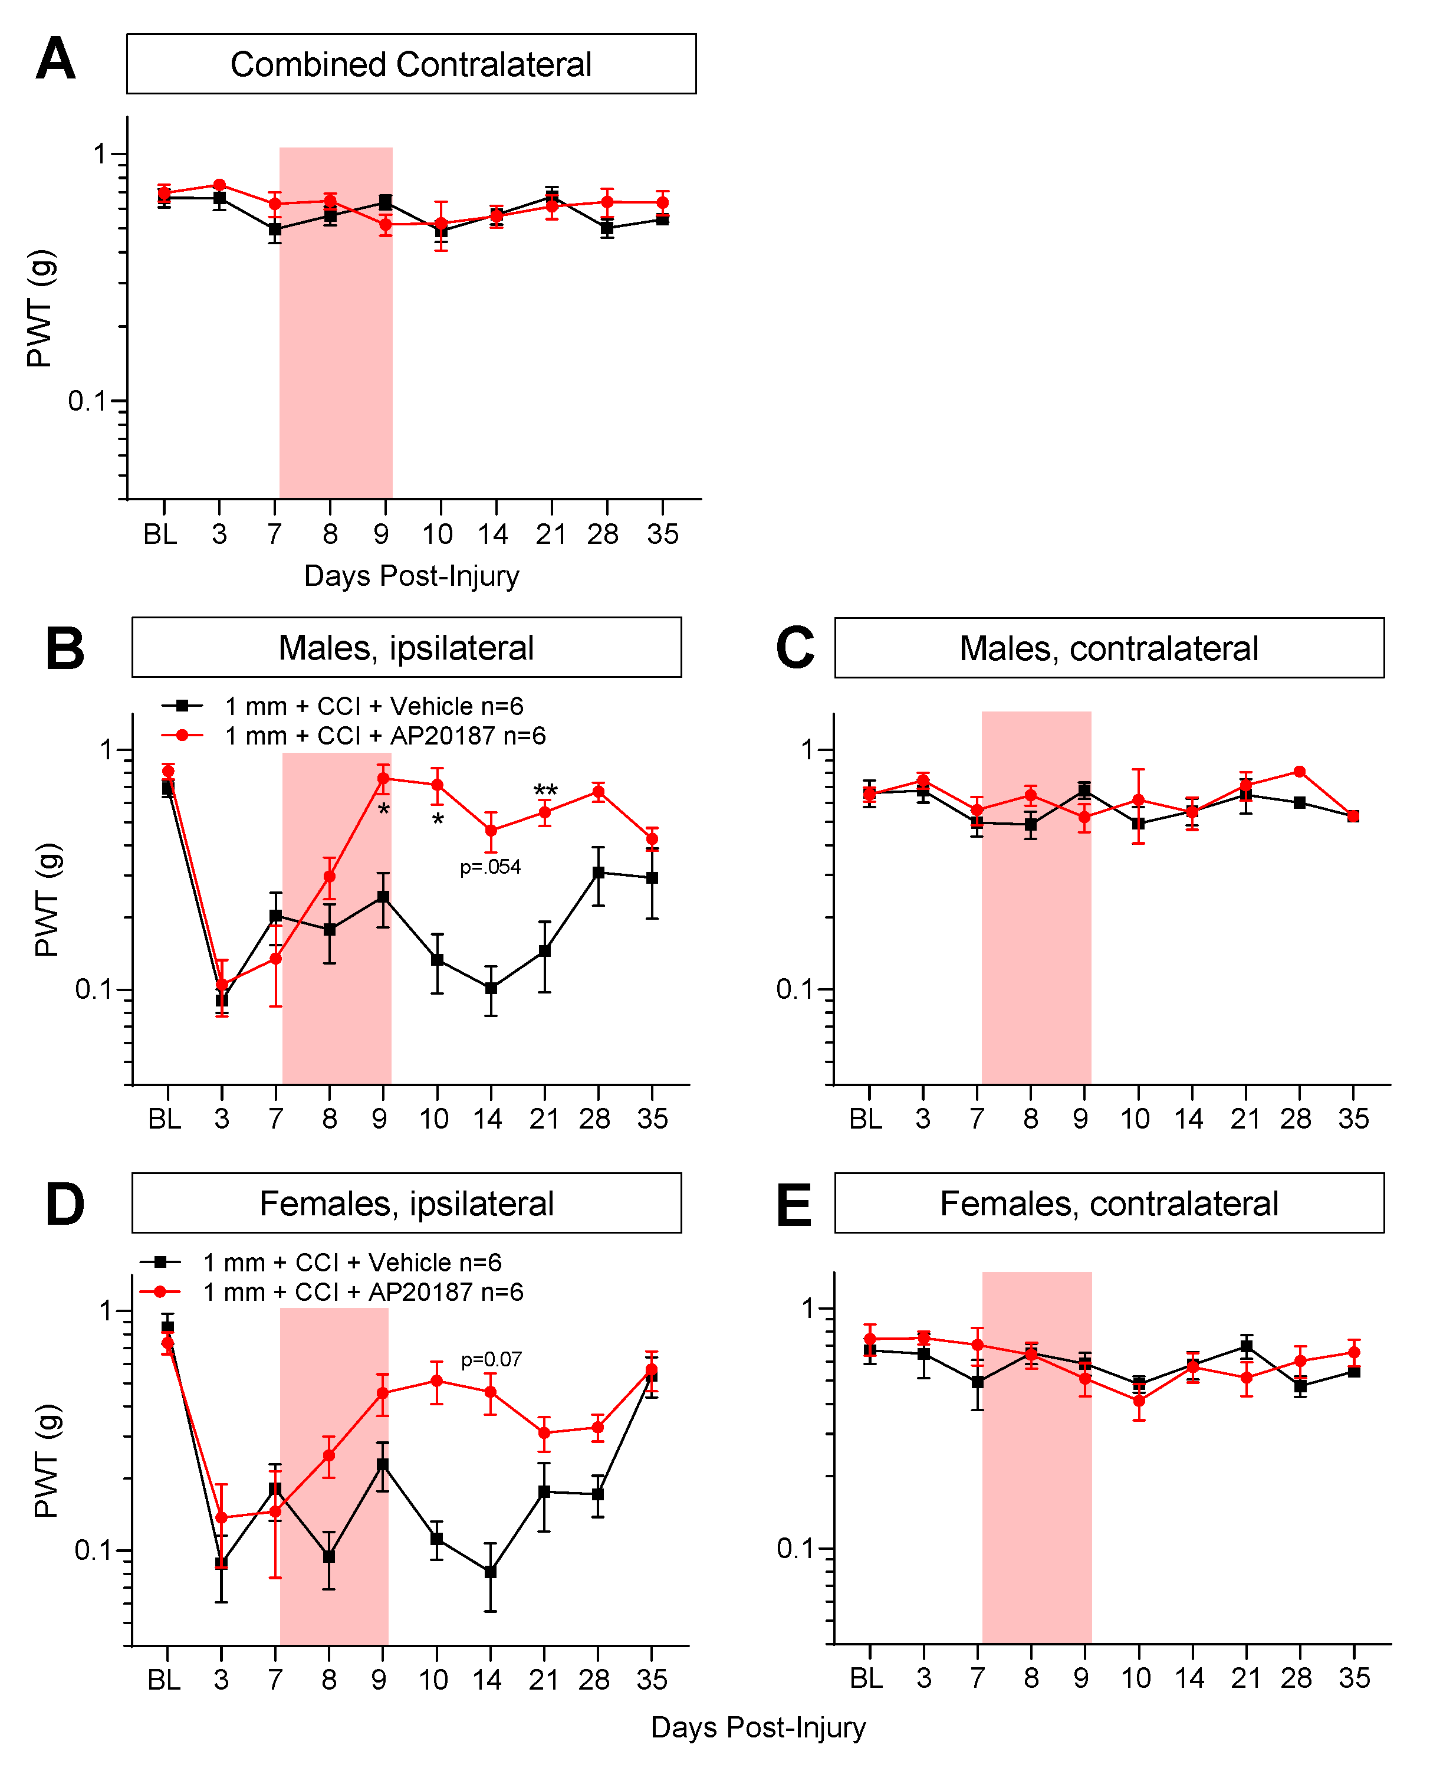
**

**Additional Figure 5 MaFIA polytrauma mouse von Frey data shows similar effects across males and females** (**A**) Contralateral MaFIA hindpaws show no polytrauma-induced changes in von Frey sensitivity. (**B**) 1 mm polytrauma induces von Frey hypersensitivity in male mice 3d and 7d post-injury. Following 3 days of AP20187 (2mg/kg, i.p.) or vehicle dosing, a significant reversal of hypersensitivity persists for up to 21d. (**C**) No significant effect of AP20187 on contralateral male hindlimbs. (**D**) 1 mm polytrauma induces hypersensitivity in female mice 3d and 7d post-injury. AP20187 is associated with a strong tendency to reversal of hypersensitivity up to 14d post-injury. (**E**) No significant effect of AP20187 on female contralateral hindlimb paw withdrawal thresholds.


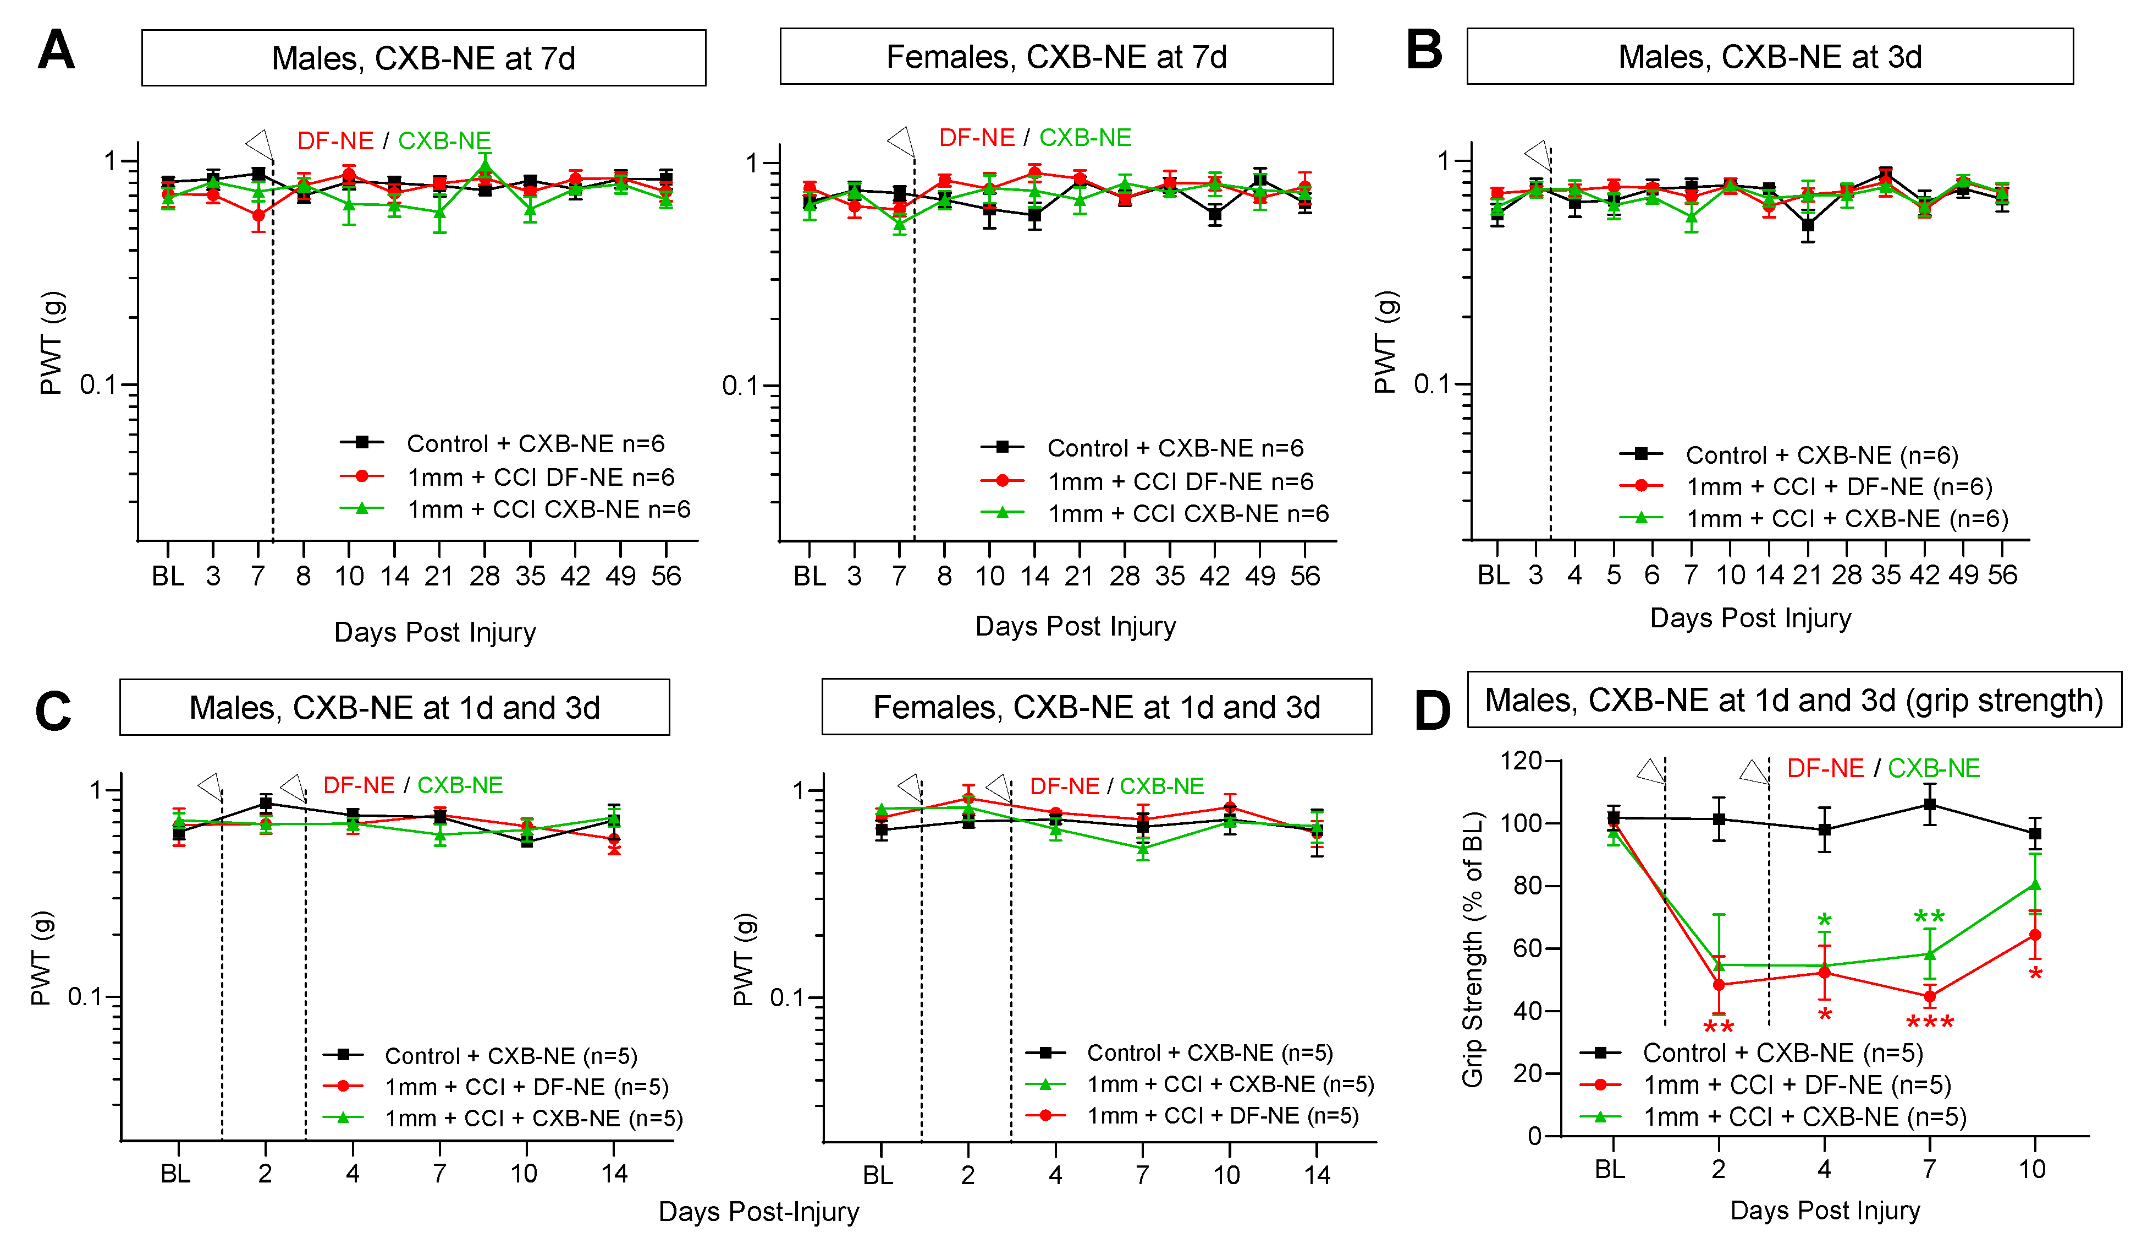


**Additional Figure 6 Von Frey data for contralateral hindpaws of male and female polytrauma mice treated with DF-NE or CXB-NE** No significant effect of DF-NE or CXB-NE on contralateral hindpaw paw withdrawal thresholds (**A**) Males (left panel) and females (right panel) with NE dosing at 7 days post-injury. (**B**) Males with NE dosing at 3 days post-injury. (**C**) Males (left panel) and females (right panel) with NE dosing at 1d and 3d post-injury.(**D**)1 mm polytrauma is also associated with a significant decrease in hindlimb grip strength versus controls. DF-NE or CXB-NE dosing at 1d and 3d post-injury does not significantly affect grip strength. */**/*** p=<.05, .01, .001 versus ‘Control + CXB-NE,’ two-way ANOVA, Šídák's multiple comparisons test.


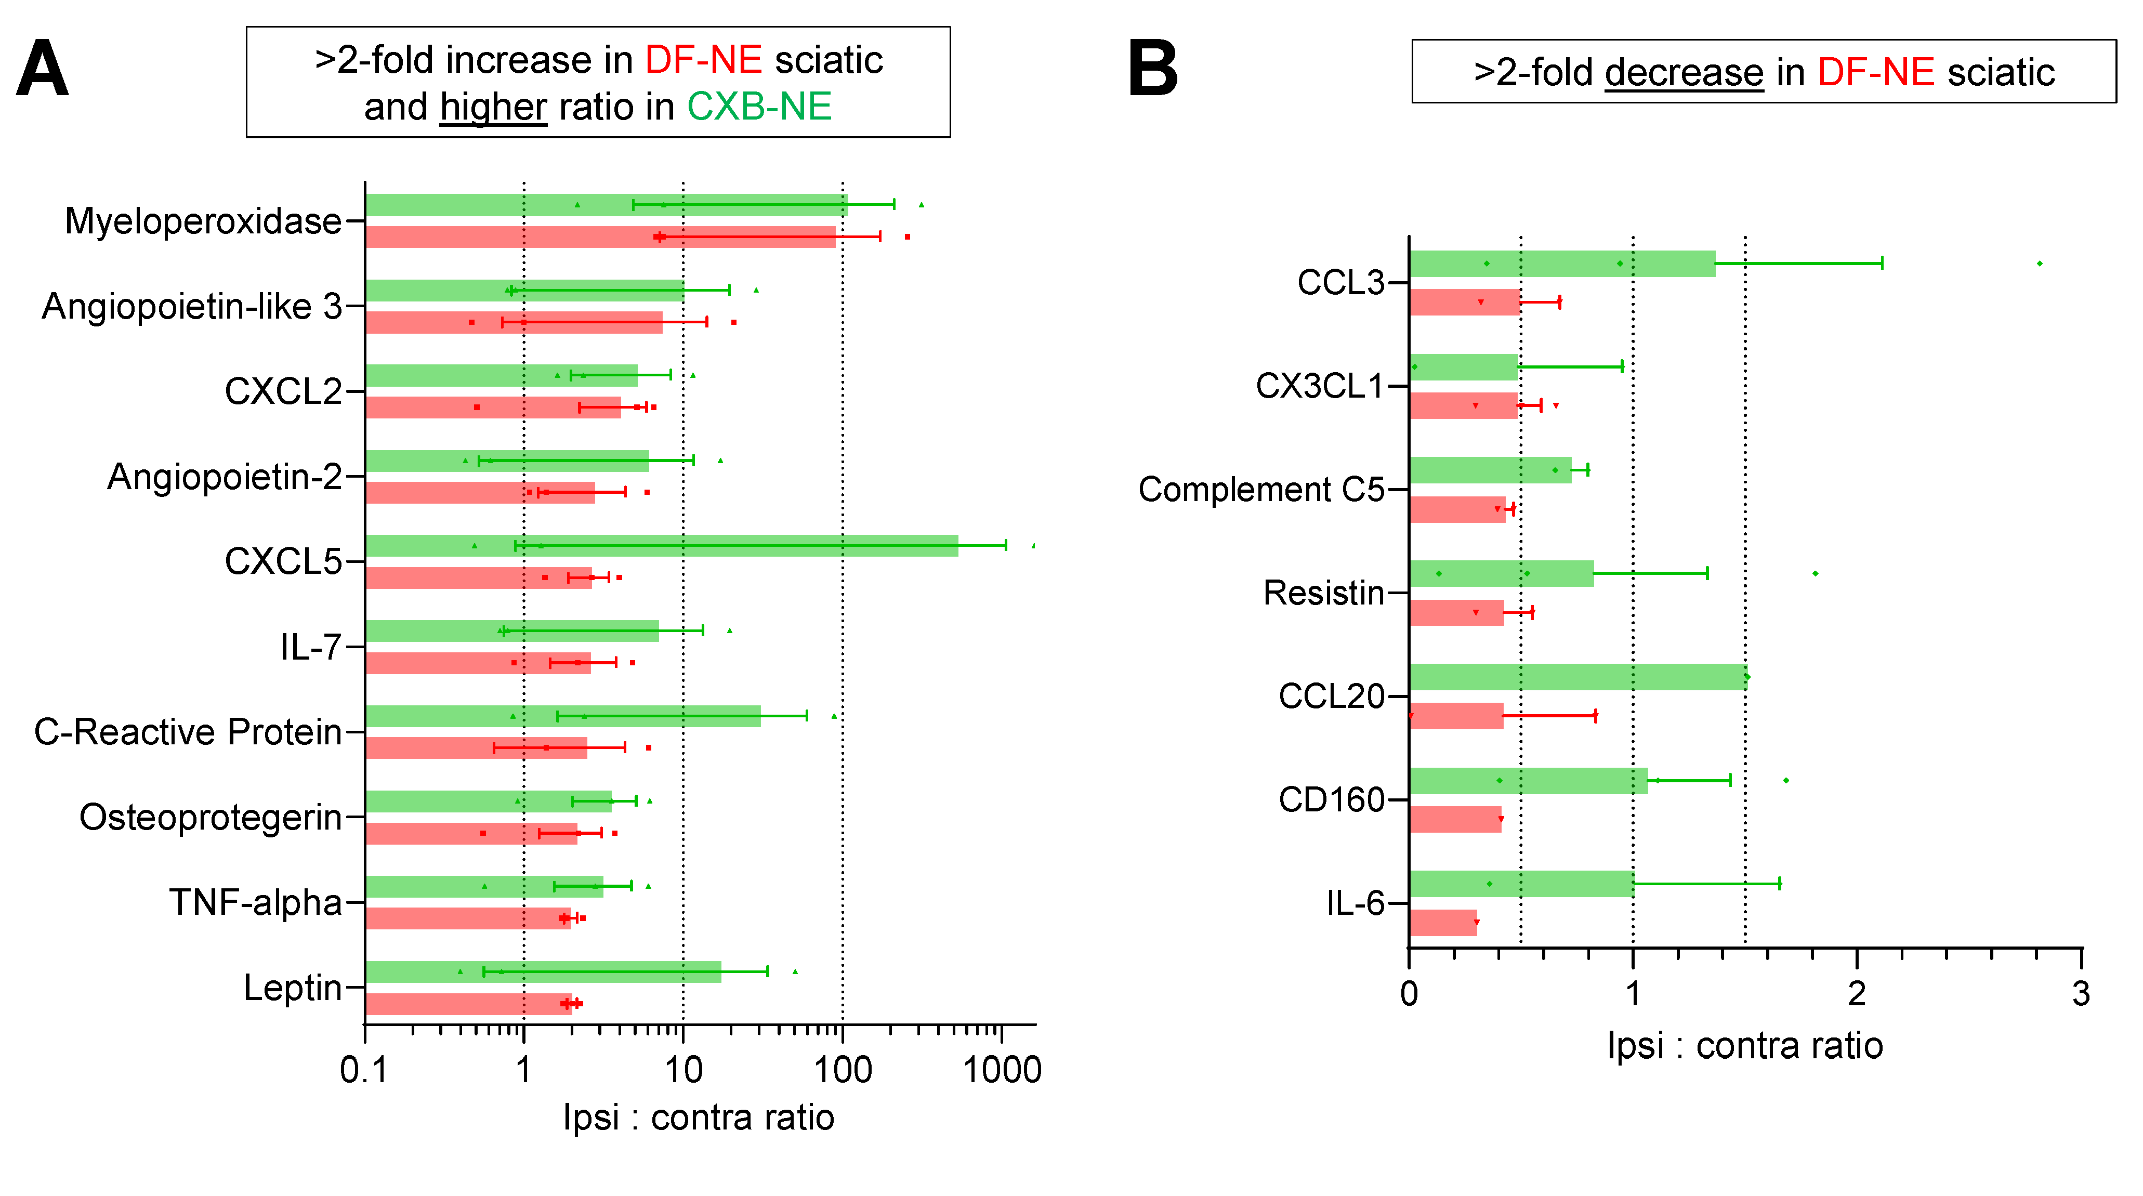


**Additional Figure 7 Differential expression of inflammatory mediators in polytrauma sciatic nerves after treatment with DF-NE or CXB-NE** (**A**) differential expression between DF-NE and CXB-NE treatment where CXB-NE treatment was associated with a higher ratio than in DF-NE. Ten of the 67 factors detected met these criteria. (**B**) factors that showed a substantial decrease in ipsilateral expression following DF-NE treatment (mean ratio ≤0.5). Of the 67 differentially expressed factors in DF-NE sciatic nerves, 7 factors met this criterion and show similar or greater expression in tissues from CXB-NE-treated mice.

**Additional Table 1.** List of inflammatory mediators detected in injured sciatic nerves and their fold-chenage in expression in CXB-NE versus DF-NE treated mice.

|  | log2FC | p |
| --- | --- | --- |
| MMP-9 | -4.38864 | 0.0001 |
| MMP-3 | -2.60295 | 0.000115 |
| IGFBP-2 | -2.33969 | 0.000652 |
| IFN-γ | -1.11757 | 0.002245 |
| IL-27 | -2.86073 | 0.004966 |
| CCL5 | -3.41898 | 0.009807 |
| CD105 | -2.7282 | 0.010292 |
| PDGF-BB | -8.35307 | 0.010577 |
| Leptin | 3.104091 | 0.011167 |
| CCL2 | -4.12989 | 0.011795 |
| CXCL9 | -2.62682 | 0.013245 |
| Lipocalin-2 | -2.09539 | 0.013867 |
| G-CSF | -1.5122 | 0.014957 |
| Gas 6 | -0.90465 | 0.016607 |
| CCL21 | -3.99479 | 0.017399 |
| CXCL13 | -0.83784 | 0.023642 |
| CXCL2 | 0.349594 | 0.052093 |
| CXCL1 | -1.02427 | 0.072916 |
| CXCL11 | -0.96017 | 0.078257 |
| Chitinase3-like 1 | -1.12502 | 0.09282 |
| EGF | -5.63757 | 0.130654 |
| TNF-α | 0.668096 | 0.159181 |
| CCL6 | -1.86139 | 0.16371 |
| MMP-2 | -0.85129 | 0.165397 |
| PCSK9 | -3.1217 | 0.208715 |
| CCL12 | -5.28291 | 0.218462 |
| Thrombopoietin | -1.63678 | 0.219782 |
| CCL11 | -0.64254 | 0.229557 |
| IL-1α | -1.34421 | 0.257563 |
| TIM-1 | -0.12475 | 0.258363 |
| IL-15 | -1.51094 | 0.262903 |
| Amphiregulin | -1.87053 | 0.264297 |
| IL-1ra | -0.88943 | 0.265439 |
| IL-11 | -0.74911 | 0.270404 |
| LDLR | -1.42132 | 0.27417 |
| CD106 | -3.40725 | 0.278518 |
| IL-5 | -3.06981 | 0.282794 |
| Endostatin | -1.13364 | 0.297494 |
| LIF | -3.1988 | 0.297876 |
| IL-33 | -0.55665 | 0.304794 |
| Fetuin A | -1.11957 | 0.30766 |
| Osteopontin | -0.86494 | 0.312188 |
| RBP4 | -0.80199 | 0.326577 |
| CD62P | -4.5716 | 0.32981 |
| Myeloperoxidase | 0.26046 | 0.344449 |
| GDF-15 | -1.77974 | 0.350106 |
| HGF | -3.61786 | 0.355055 |
| IL-4 | -2.4979 | 0.359135 |
| Pentraxin 3 | -0.97033 | 0.359292 |
| CD26 | -1.31369 | 0.367453 |
| Serpin E1 | -0.01033 | 0.369104 |
| DKK-1 | -2.31341 | 0.36971 |
| CD54 | -5.31825 | 0.37211 |
| CXCL5 | 7.643081 | 0.378948 |
| Angiopoietin-like 3 | 0.454438 | 0.424561 |
| Cystatin C | -0.01773 | 0.476389 |
| C-Reactive Protein | 3.041521 | 0.596001 |
| Osteoprotegerin | 0.711433 | 0.673918 |
| Angiopoietin-2 | 1.119859 | 0.819373 |
| IL-7 | 1.421578 | 0.981823 |
